# Supplementary material
Source: Springer Nature journal article supplement (https://www.springermedizin.de/resource/supplementary/12890_2014_562_MOESM1_ESM.pdf/9505316)
Supplement: MOESM1 [file 9505316]

**Assessed for Eligibility**  
(n=73)

**Screen Failures** (n=40)

Reasons, n (%):

- Failed spirometry entry criteria, 11 (15.1)
- Failed FEV<sub>1</sub> Reversibility, 25 (34.2)
- Failed ECG, 5 (6.8)
- Sponsor closed study, 1 (1.4)

**Randomized** (n=33)

- Sequence 1 (PBO/28.8/57.6/115.2), n=6
- Sequence 2 (14.4/28.8/PL/115.2), n=5
- Sequence 3 (14.4/PBO/57.6/TIO), n=5
- Sequence 4 (14.4/TBO/57.6/115.2), n=5
- Sequence 5 (14.4/28.8/TIO/115.2), n=6
- Sequence 6 (TIO/28.8/57.6/PBO), n=6

**Completed** (n=31)

**Withdrawn** (n=2)

Reasons, n (%):

- Rescue medication use, 2 (6.1)
